# Supplementary material for: Enhancing Regional Quasi-Geoid Refinement Precision: An Analytical Approach Employing ADS80 Tri-linear Array Stereoscopic Imagery for Aerial Triangulation Densification and GNSS Gravity-Potential Leveling
Source: Preprints.org preprint supplement (doi:10.20944/preprints202407.0077.v1), 2024-07-01
Supplement: Supplementary file 2 [file supplementary]

## Article

# Enhancing Regional Quasi-Geoid Refinement Precision: An Analytical Approach Employing ADS80 Tri-linear Array Stereoscopic Imagery for Aerial Triangulation Densification and GNSS Gravity-Potential Leveling

Wei Xu <sup>1,2,3</sup>, Gang Chen <sup>1,\*</sup>, Defang Yang <sup>2,3</sup>, Kaihua Ding <sup>4</sup>, Rendong Dong <sup>5</sup>, Xuyan Ma <sup>2,3</sup>, Sipeng Han <sup>1,6</sup>, Shengpeng Zhang <sup>7,8</sup> and Yongyin Zhang <sup>8</sup>

<sup>1</sup> Key Laboratory of Geological Survey and Evaluation of Ministry of Education, China University of Geosciences (Wuhan), Wuhan 430074, China; cugxuwei@cug.edu.cn (W.X.); ddwhcg@cug.edu.cn (G.C.); yang-defang@cug.edu.cn (D.Y.); chaoshu@cug.edu.cn (X.M.); hansipeng@cug.edu.cn (S.H.)

<sup>2</sup> Qinghai Remote Sensing Center for Natural Resources, Xining 810001, China

<sup>3</sup> Geomatics Technology and Application key Laboratory of Qinghai Province, Xining 810001, China

<sup>4</sup> School of Geography and Information Engineering, China University of Geosciences (Wuhan), Wuhan 430074, China; khding@cug.edu.cn

<sup>5</sup> School of Geophysics and Geomatics, China University of Geosciences (Wuhan), Wuhan 430074, China; rendong@cug.edu.cn

<sup>6</sup> Research Center of Applied Geology of China Geological Survey, Chendu 610065, China

<sup>7</sup> College of Geographical Sciences, Qinghai Normal University, Xining 810001, China; 202147341022@stu.qhnu.edu.cn (S.Z.); hhzyy@cug.edu.cn (Y.Z.)

<sup>8</sup> Qinghai Basic Surveying and Mapping Institute, Xining 810001, China

\* Correspondence: ddwhcg@cug.edu.cn

## Contents of this file

Tables S1 to S6

**Citation:** To be added by editorial staff during production.

Academic Editor: Firstname Last-name

Received: date

Revised: date

Accepted: date

Published: date

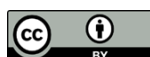

**Copyright:** © 2024 by the authors.

Submitted for possible open access

publication under the terms and

conditions of the Creative Commons

Attribution (CC BY) license

(<https://creativecommons.org/licenses/by/4.0/>).

**Table S1.** Precision Enhancement of Aerial Triangulation for Control Point Layout Scheme I.

43

| JCP |                |               |     |                |               |     |                |               |
|-----|----------------|---------------|-----|----------------|---------------|-----|----------------|---------------|
| NUM | $\delta XY(m)$ | $\delta Z(m)$ | NUM | $\delta XY(m)$ | $\delta Z(m)$ | NUM | $\delta XY(m)$ | $\delta Z(m)$ |
| 1   | 0.1022         | 0             | 17  | 0.3662         | 0             | 33  | 0.146          | 0.1381        |
| 2   | 0.1759         | 0             | 18  | 0.0472         | 0.0224        | 34  | 0.108          | 0             |
| 3   | 0.0884         | 0.3914        | 19  | 0.0772         | 0             | 35  | 0.0848         | 0.0813        |
| 4   | 0.1993         | 0.3588        | 20  | 0.6252         | 0.244         | 36  | 0.0533         | 0             |
| 5   | 0.3534         | 0.3168        | 21  | 0.2557         | 0             | 37  | 0.0715         | 0             |
| 6   | 0.587          | 0.5708        | 22  | 0.1781         | 0.3254        | 38  | 0.085          | 0             |
| 7   | 0.2593         | 0.1218        | 23  | 0.0456         | 0             | 39  | 0.2569         | 0.0814        |
| 8   | 0.1218         | 0.1393        | 24  | 0.2962         | 0             | 40  | 0.0985         | 0             |
| 9   | 0.154          | 0.1341        | 25  | 0.0514         | 0             | 41  | 0.1022         | 0             |
| 10  | 0.0846         | 0             | 26  | 0.1462         | 0.1345        | 42  | 0.0846         | 0             |
| 11  | 0.0959         | 0             | 27  | 0.1284         | 0             | 43  | 0.0976         | 0             |
| 12  | 0.19           | 0.2435        | 28  | 0.0818         | 0.4068        | 44  | 0.0772         | 0             |
| 13  | 0.1082         | 0             | 29  | 0.2352         | 0.5695        | 45  | 0.0514         | 0             |
| 14  | 0.0976         | 0             | 30  | 0.0418         | 0             | 46  | 0.0418         | 0             |
| 15  | 0.315          | 0.3482        | 31  | 0.5281         | 0.4178        | -   | -              | -             |
| 16  | 0.2495         | 0.4874        | 32  | 0.1414         | 0.1345        | -   | -              | -             |

**Table S2.** Precision Enhancement of Aerial Triangulation for Control Point Layout Scheme II.

44

| GCP |                |               | JCP |                |               |     |                |               |
|-----|----------------|---------------|-----|----------------|---------------|-----|----------------|---------------|
| NUM | $\delta XY(m)$ | $\delta Z(m)$ | NUM | $\Delta XY(m)$ | $\delta Z(m)$ | NUM | $\delta XY(m)$ | $\delta Z(m)$ |
| 1   | 0.3538         | 0.0978        | 1   | 0.0993         | 0             | 20  | 0.1057         | 0             |
| 2   | 0.2064         | 0.3914        | 2   | 0.4368         | 0             | 21  | 0.3283         | 0.078         |
| 3   | 0.3351         | 0             | 3   | 0.4806         | 0.0978        | 22  | 0.5484         | 0             |
| 4   | 0.2623         | 0.1624        | 4   | 0.1185         | 0.4193        | 23  | 0.1749         | 0             |
| 5   | 0.2128         | 0.2344        | 5   | 0.4202         | 0.4468        | 24  | 0.4392         | 0             |
| 6   | 0.4203         | 0.4881        | 6   | 0.3254         | 0.3742        | 25  | 0.1031         | 0             |
| 7   | 0.4179         | 0.1953        | 7   | 0.2216         | 0.0976        | 26  | 0.2495         | 0.1172        |
| 8   | 0.3534         | 0.3119        | 8   | 0.1998         | 0.3904        | 27  | 0.2256         | 0             |
| -   | -              | -             | 9   | 0.1936         | 0             | 28  | 0.456          | 0.1754        |
| -   | -              | -             | 10  | 0.1519         | 0.1952        | 29  | 0.1422         | 0.0696        |
| -   | -              | -             | 11  | 0.2556         | 0.4062        | 30  | 0.1163         | 0             |
| -   | -              | -             | 12  | 0.4969         | 0.2843        | 31  | 0.2379         | 0.0292        |
| -   | -              | -             | 13  | 0.2285         | 0.4062        | 32  | 0.314          | 0.0668        |
| -   | -              | -             | 14  | 0.2242         | 0             | 33  | 0.0993         | 0             |
| -   | -              | -             | 15  | 0.2935         | 0.2339        | 34  | 0.1058         | 0.117         |
| -   | -              | -             | 16  | 0.1058         | 0.117         | 35  | 0.0674         | 0             |
| -   | -              | -             | 17  | 0.3492         | 0.2432        | 36  | 0.1057         | 0             |
| -   | -              | -             | 18  | 0.0674         | 0             | 37  | 0.2256         | 0             |
| -   | -              | -             | 19  | 0.1151         | 0             | 38  | 0.1163         | 0             |

**Table S3.** Precision Enhancement of Aerial Triangulation for Control Point Layout Scheme III.

45

| GCP |                |               | JCP |                |               |     |                |               |
|-----|----------------|---------------|-----|----------------|---------------|-----|----------------|---------------|
| NUM | $\delta XY(m)$ | $\delta Z(m)$ | NUM | $\delta XY(m)$ | $\delta Z(m)$ | NUM | $\delta XY(m)$ | $\delta Z(m)$ |
| 1   | 0.1444         | 0.1223        | 1   | 0.1217         | 0             | 17  | 0.2145         | 0             |
| 2   | 0.064          | 0             | 2   | 0.1977         | 0.2446        | 18  | 0.2531         | 0             |
| 3   | 0.3684         | 0.4892        | 3   | 0.4685         | 0.2437        | 19  | 0.3593         | 0.2258        |
| 4   | 0.0919         | 0.1337        | 4   | 0.1435         | 0.0976        | 20  | 0.0867         | 0             |
| 5   | 0.0609         | 0             | 5   | 0.1908         | 0.117         | 21  | 0.1528         | 0             |
| 6   | 0.0867         | 0             | 6   | 0.1611         | 0.3656        | 22  | 0.0882         | 0             |
| 7   | 0.1428         | 0             | 7   | 0.0121         | 0             | 23  | 0.4863         | 0.2339        |
| 8   | 0.1262         | 0.1952        | 8   | 0.3531         | 0.3656        | 24  | 0.2695         | 0             |
| 9   | 0.0865         | 0.2339        | 9   | 0.2663         | 0.1219        | 25  | 0.1572         | 0             |
| 10  | 0.2027         | 0             | 10  | 0.1463         | 0             | 26  | 0.1322         | 0.325         |
| 11  | 0.0121         | 0             | 11  | 0.0804         | 0             | 27  | 0.1314         | 0             |
| 12  | 0.1659         | 0.117         | 12  | 0.1094         | 0             | 28  | 0.1664         | 0.4881        |
| 13  | 0.0609         | 0             | 13  | 0.1945         | 0.2339        | 29  | 0.064          | 0             |
| 14  | 0.0933         | 0.2339        | 14  | 0.0367         | 0.1337        | 30  | 0.1463         | 0             |
| 15  | 0.11           | 0.1953        | 15  | 0.1937         | 0             | -   | -              | -             |
| 16  | 0.0919         | 0.1337        | 16  | 0.139          | 0             | -   | -              | -             |

**Table S4.** Precision Enhancement of Aerial Triangulation for Control Point Layout Scheme IV.

46

| GCP |                |               | JCP |                |               |     |                |               |
|-----|----------------|---------------|-----|----------------|---------------|-----|----------------|---------------|
| NUM | $\delta XY(m)$ | $\delta Z(m)$ | NUM | $\delta XY(m)$ | $\delta Z(m)$ | NUM | $\delta XY(m)$ | $\delta Z(m)$ |
| 1   | 0.2014         | 0             | 17  | 0.0514         | 0             | 1   | 0.0829         | 0             |
| 2   | 0.2561         | 0.125         | 18  | 0.1427         | 0.0351        | 2   | 0.1765         | 0.195         |
| 3   | 0.0695         | 0             | 19  | 0.3977         | 0.1945        | 3   | 0.2503         | 0.25          |
| 4   | 0.1865         | 0.4           | 20  | 0.0248         | 0.0679        | 4   | 0.0383         | 0.0234        |
| 5   | 0.1652         | 0.3899        | 21  | 0.2313         | 0.0814        | 5   | 0.1773         | 0.0976        |
| 6   | 0.0383         | 0.0234        | 22  | 0.1735         | 0.1218        | 6   | 0.3191         | 0.0976        |
| 7   | 0.1745         | 0             | 23  | 0.2408         | 0.1394        | 7   | 0.2452         | 0.0697        |
| 8   | 0.1514         | 0             | 24  | 0.349          | 0.1563        | 8   | 0.1745         | 0             |
| 9   | 0.014          | 0             | 25  | 0.1738         | 0.078         | 9   | 0.2104         | 0.293         |
| 10  | 0.0514         | 0             | 26  | 0.1786         | 0.1172        | 10  | 0.04           | 0.2423        |
| 11  | 0.1206         | 0.0697        | 27  | 0.2654         | 0.1358        | 11  | 0.2068         | 0.3899        |
| 12  | 0.0655         | 0.0697        | 28  | 0.2318         | 0             | 12  | 0.014          | 0             |
| 13  | 0.1352         | 0.2924        | 29  | 0.1514         | 0             | 13  | 0.1579         | 0.0977        |
| 14  | 0.4589         | 0.2843        | 30  | 0.0933         | 0.1218        | 14  | 0.0977         | 0.2486        |
| 15  | 0.2487         | 0.195         | 31  | 0.0752         | 0.0146        | 15  | 0.0695         | 0             |
| 16  | 0.1679         | 0             | -   | -              | -             | -   | -              | -             |

47

48

**Table S5.** Precision Enhancement of Aerial Triangulation for Control Point Layout Scheme V.

49

| GCP |                |               | JCP |                |               |     |                |               |
|-----|----------------|---------------|-----|----------------|---------------|-----|----------------|---------------|
| NUM | $\delta XY(m)$ | $\delta Z(m)$ | NUM | $\delta XY(m)$ | $\delta Z(m)$ | NUM | $\delta XY(m)$ | $\delta Z(m)$ |
| 1   | 0.1845         | 0             | 21  | 0.3075         | 0.067         | 1   | 0.2623         | 0.0489        |
| 2   | 0.1513         | 0.2437        | 22  | 0.0663         | 0.1626        | 2   | 0.0286         | 0             |
| 3   | 0.0298         | 0.0612        | 23  | 0.1162         | 0             | 3   | 0.0639         | 0             |
| 4   | 0.3581         | 0.1957        | 24  | 0.184          | 0.2441        | 4   | 0.0713         | 0.2339        |
| 5   | 0.2346         | 0.4543        | 25  | 0.0966         | 0             | 5   | 0.0459         | 0             |
| 6   | 0.1092         | 0             | 26  | 0.1115         | 0.0696        | 6   | 0.0259         | 0.0407        |
| 7   | 0.1983         | 0.1393        | 27  | 0.0566         | 0             | -   | -              | -             |
| 8   | 0.0674         | 0.0936        | 28  | 0.169          | 0.0951        | -   | -              | -             |
| 9   | 0.0911         | 0             | 29  | 0.0125         | 0             | -   | -              | -             |
| 10  | 0.1519         | 0             | 30  | 0.1218         | 0             | -   | -              | -             |
| 11  | 0.1393         | 0.1626        | 31  | 0.0772         | 0.0609        | -   | -              | -             |
| 12  | 0.1002         | 0.0696        | 32  | 0.0576         | 0.078         | -   | -              | -             |
| 13  | 0.1601         | 0.1393        | 33  | 0.1652         | 0.1559        | -   | -              | -             |
| 14  | 0.1127         | 0             | 34  | 0.0213         | 0.2339        | -   | -              | -             |
| 15  | 0.1186         | 0.1559        | 35  | 0.0298         | 0.0612        | -   | -              | -             |
| 16  | 0.1516         | 0.1824        | 36  | 0.0674         | 0.0936        | -   | -              | -             |
| 17  | 0.0468         | 0.1901        | 37  | 0.0639         | 0             | -   | -              | -             |
| 18  | 0.1452         | 0.0814        | 38  | 0.0708         | 0             | -   | -              | -             |
| 19  | 0.1212         | 0.134         | 39  | 0.0966         | 0             | -   | -              | -             |
| 20  | 0.0708         | 0             | 40  | 0.0125         | 0             | -   | -              | -             |

**Table S6.** Statistical information of levelling data and gravity data in China (unit:cm).

50

| Model           | Degree | Gravity Model (576 Points) |       |        |               | Level Data (26 Points) |       |        |               |
|-----------------|--------|----------------------------|-------|--------|---------------|------------------------|-------|--------|---------------|
|                 |        | Min                        | Max   | Mean   | Rmse( $\pm$ ) | Min                    | Max   | Mean   | Rmse( $\pm$ ) |
| EGM2008         | 2190   | -7.23                      | 21.98 | 6.88   | 8.61          | 7.37                   | 19.38 | 14.36  | 14.83         |
| SGG-UGM-2       | 2190   | -17.46                     | 9.51  | 8.14   | 9.09          | 1.98                   | 22.10 | 17.14  | 17.79         |
| SGG-UGM-1       | 2159   | -17.14                     | 10.82 | -7.77  | 9.38          | 3.02                   | 22.18 | 17.55  | 18.15         |
| EIGEN-6C4       | 2190   | -22.33                     | 5.76  | -10.17 | 11.74         | 2.75                   | 23.14 | 18.19  | 18.75         |
| GECO            | 2190   | -39.84                     | 3.83  | -12.99 | 17.27         | -4.68                  | 30.34 | 16.84  | 18.97         |
| XGM2019e_2159   | 2190   | -26.79                     | 4.76  | -17.48 | 18.13         | 5.49                   | 26.49 | 21.23  | 21.88         |
| EGM96           | 360    | -18.49                     | 51.19 | 16.69  | 23.74         | -37.48                 | -6.68 | -17.69 | 22.89         |
| GGM05C          | 360    | -59.37                     | 25.04 | -22.29 | 25.59         | -0.33                  | 64.8  | 21.44  | 24.98         |
| GO_CONS_GCF_2   | 300    | -75.64                     | 39.58 | -14.14 | 29.98         | 4.29                   | 74.26 | 31.52  | 36.11         |
| _TIM_R6e        |        |                            |       |        |               |                        |       |        |               |
| Tongji-         | 300    | -64.12                     | 52.62 | -15.71 | 36.18         | -13.76                 | 62.33 | 33.77  | 37.05         |
| GMMG2021S       |        |                            |       |        |               |                        |       |        |               |
| EigenCG03C      | 360    | -79.00                     | 35.43 | -38.19 | 39.92         | -4.88                  | 52.20 | 35.87  | 39.00         |
| Tongji-Grace02s | 180    | 28.91                      | 58.02 | 42.99  | 43.31         | -73.18                 | 62.07 | 12.54  | 43.02         |

---

**Disclaimer/Publisher's Note:** The statements, opinions and data contained in all publications are solely those of the individual author(s) and contributor(s) and not of MDPI and/or the editor(s). MDPI and/or the editor(s) disclaim responsibility for any injury to people or property resulting from any ideas, methods, instructions or products referred to in the content.
